# Supplementary material for: Longitudinal surveillance of drug resistance in Plasmodium falciparum isolates from the China-Myanmar border reveals persistent circulation of multidrug resistant parasites
Source: PubMed Central journal article supplement — Int J Parasitol Drugs Drug Resist. 2018 May 22;8(2):320–8. doi: 10.1016/j.ijpddr.2018.05.003 (PMC6039318; doi:10.1016/j.ijpddr.2018.05.003), 2018-05-22
Supplement: mmc2.pdf [file mmc2.pdf]

Fig. S1

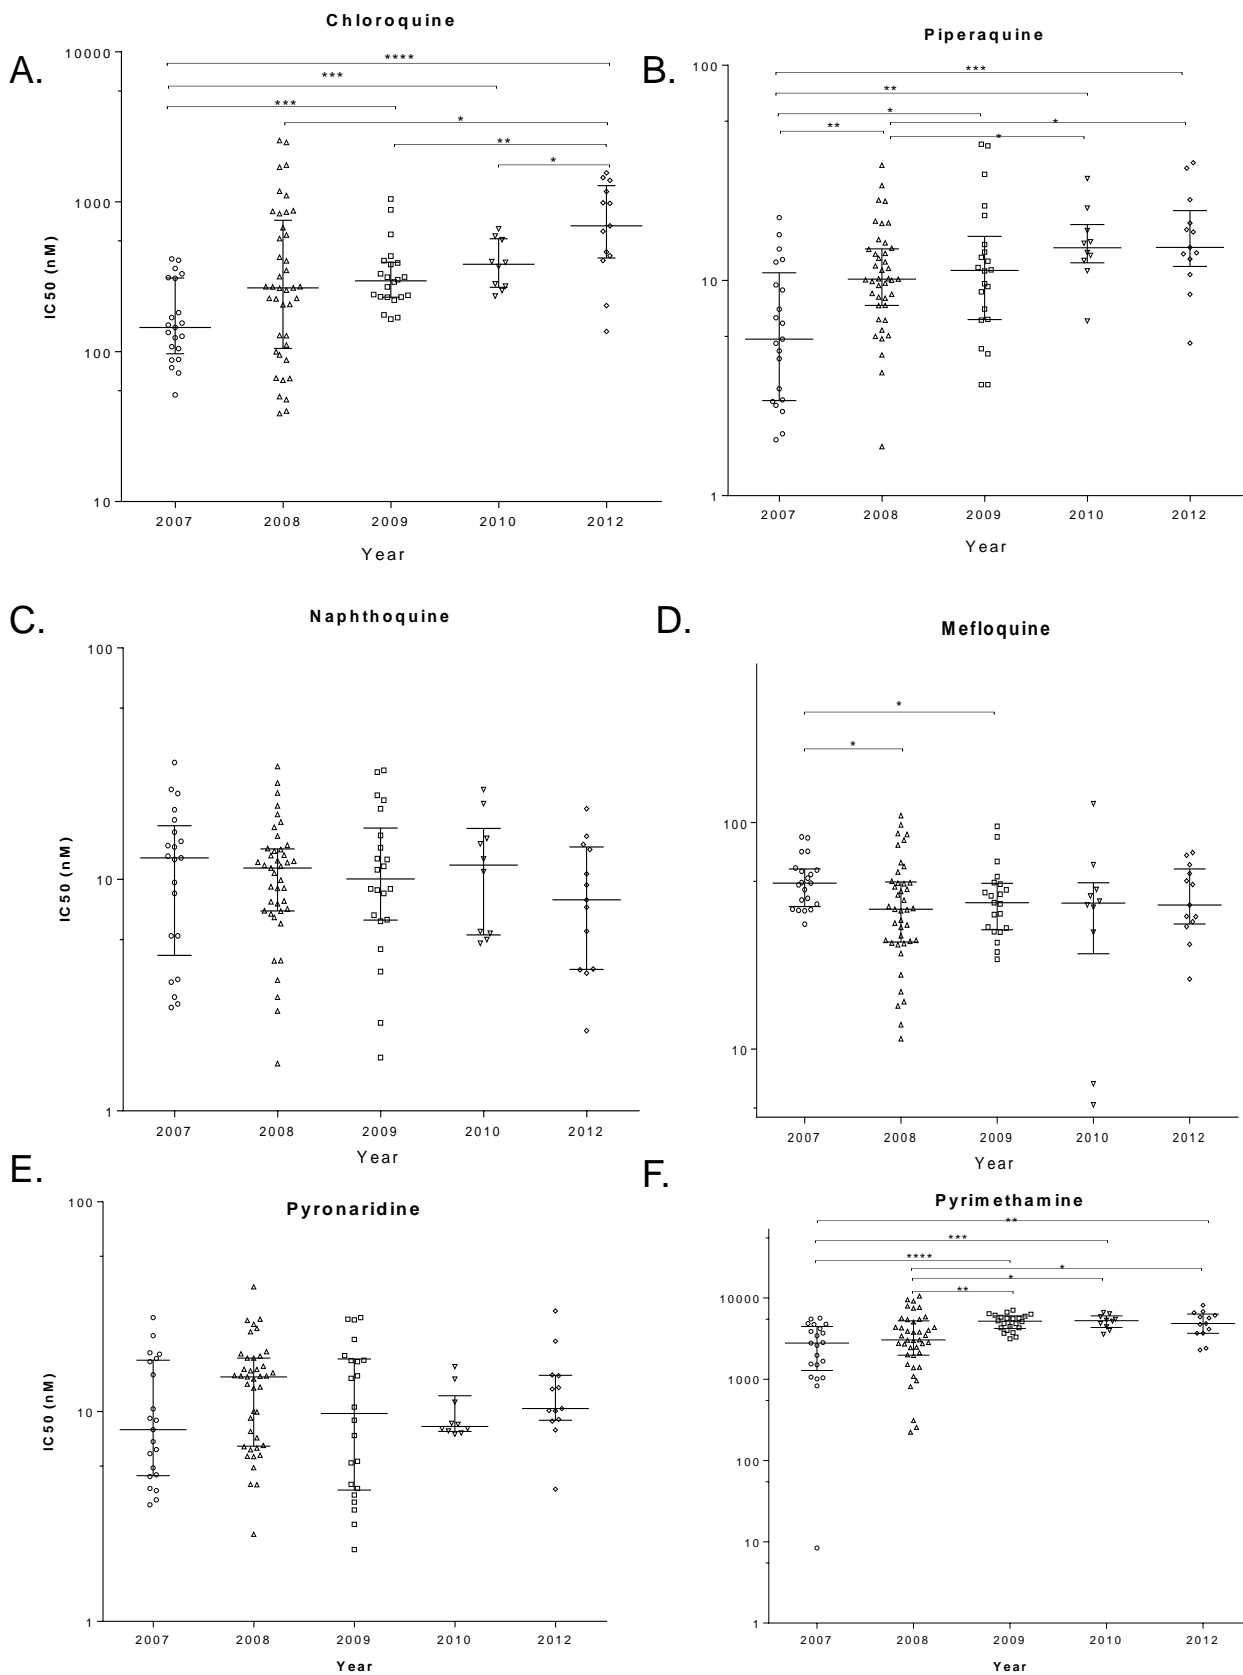

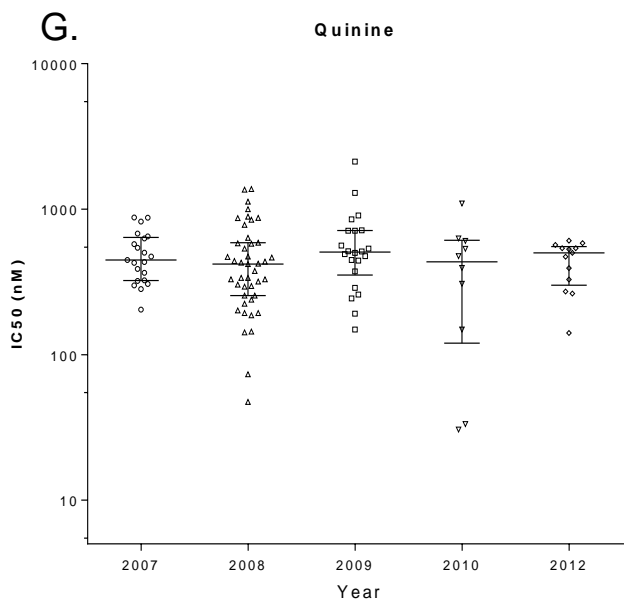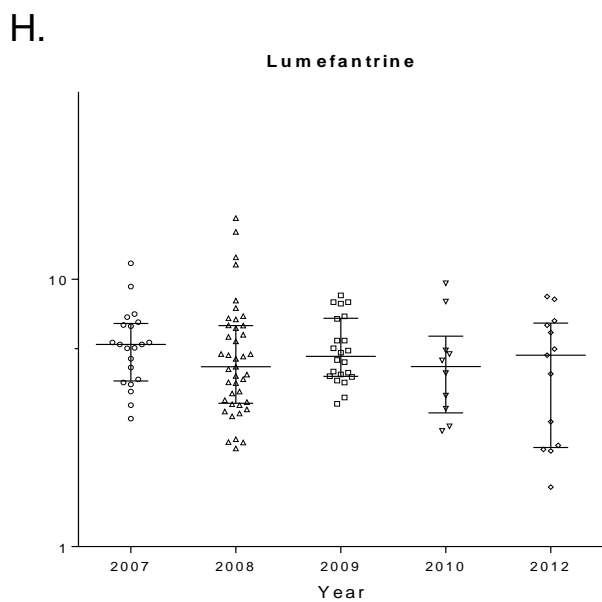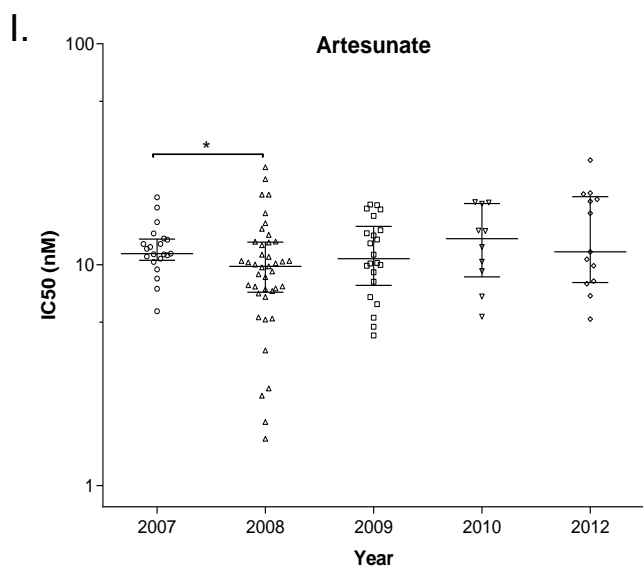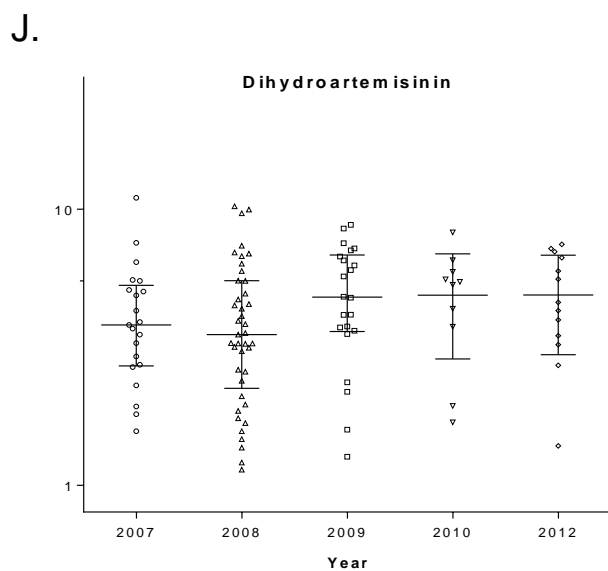

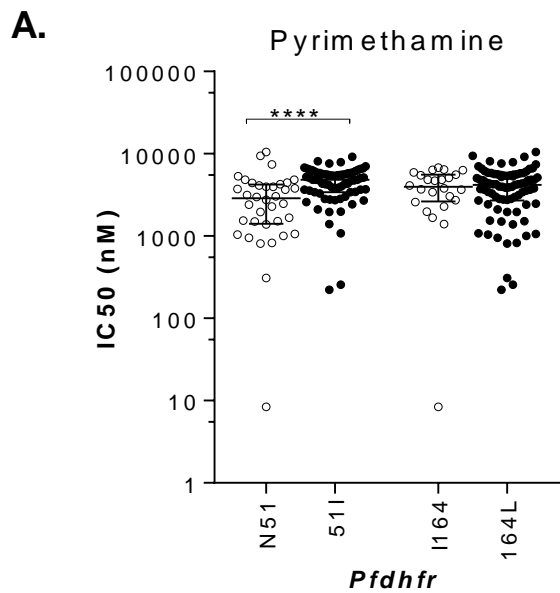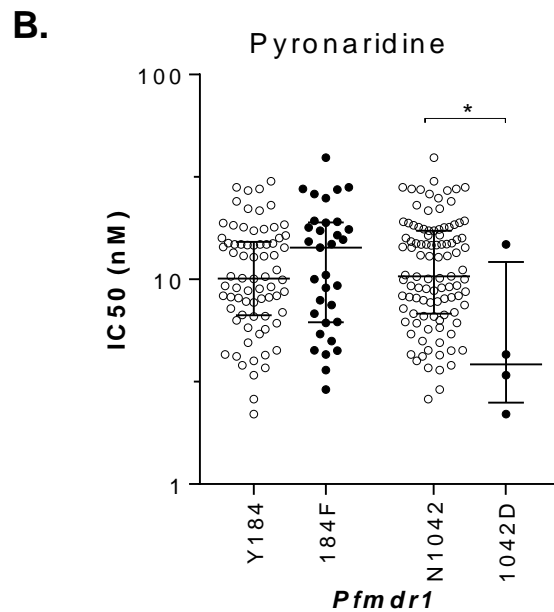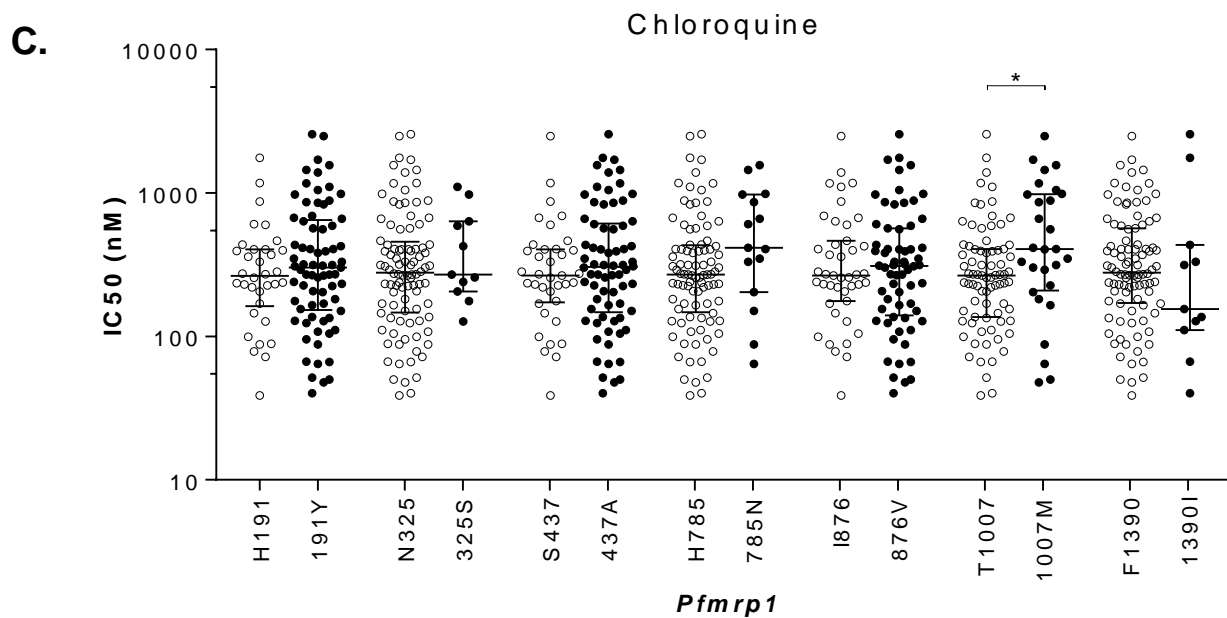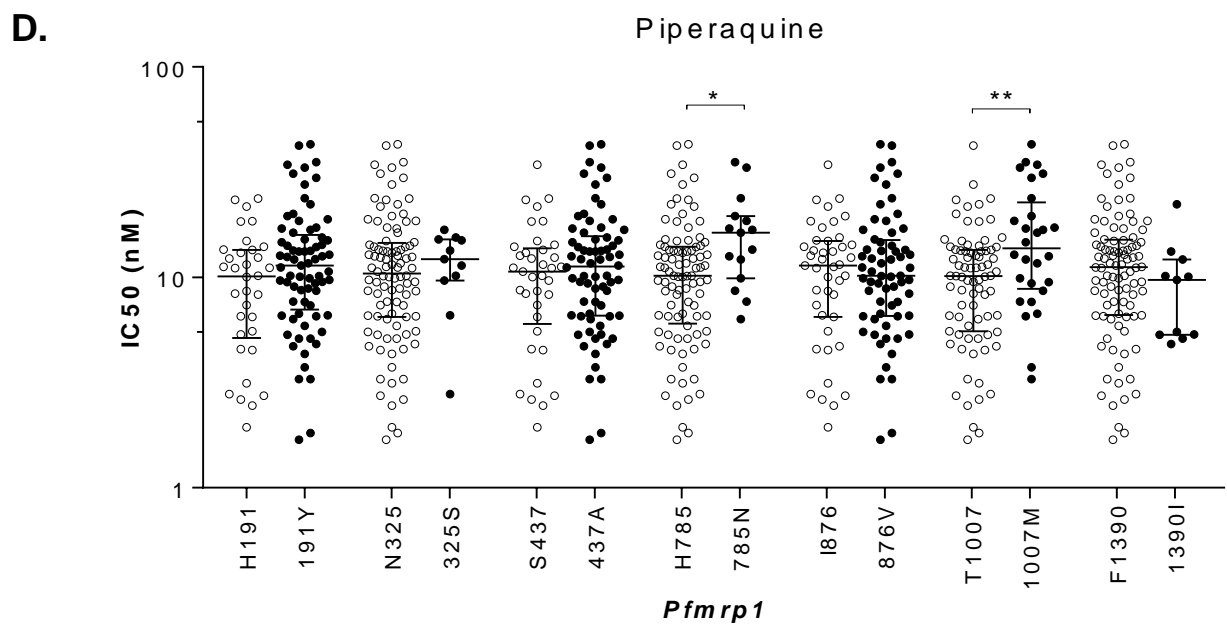

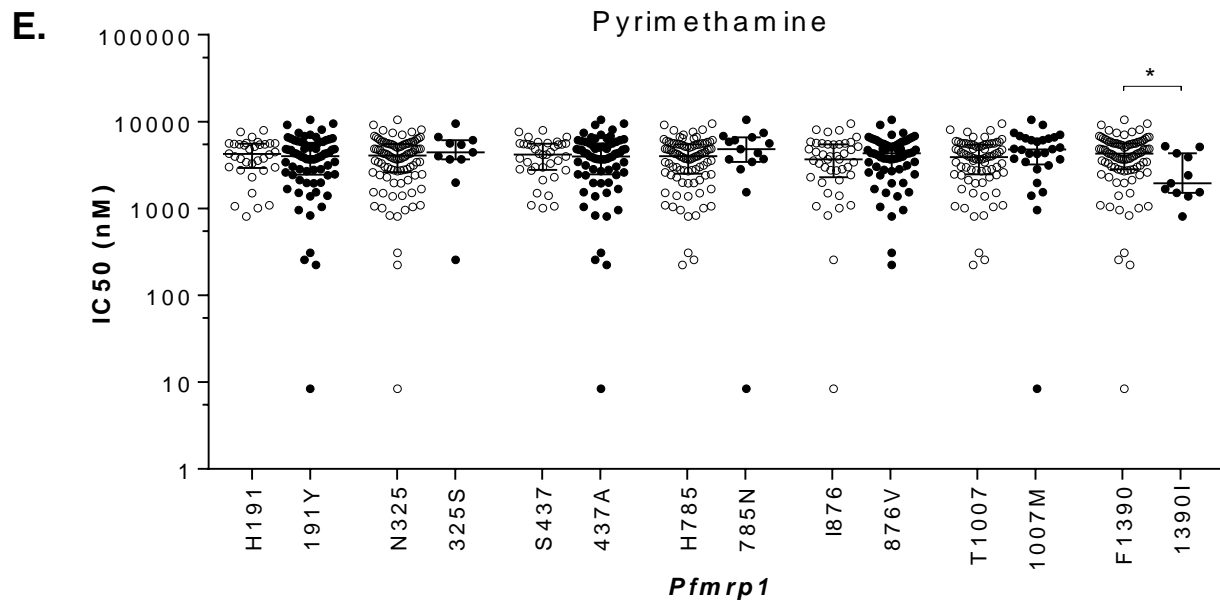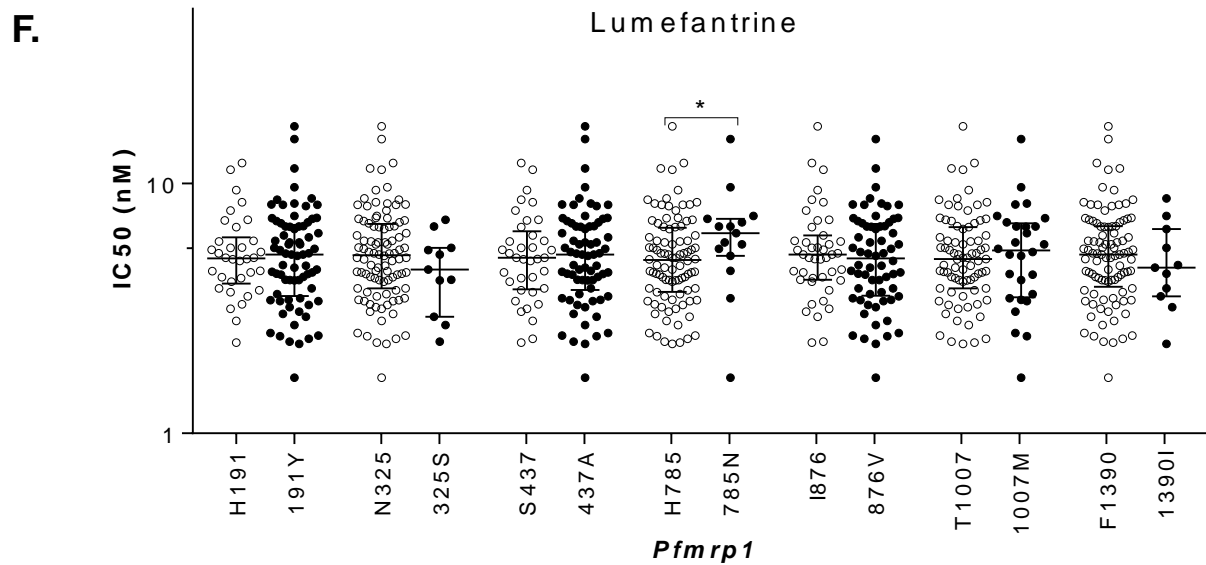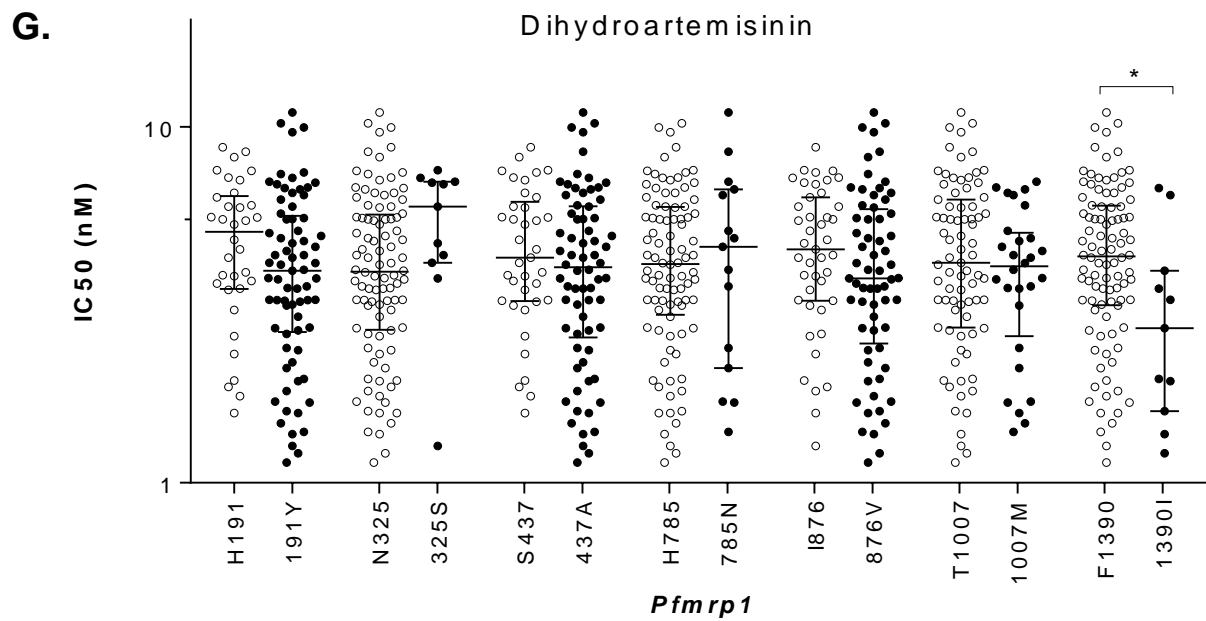

H.

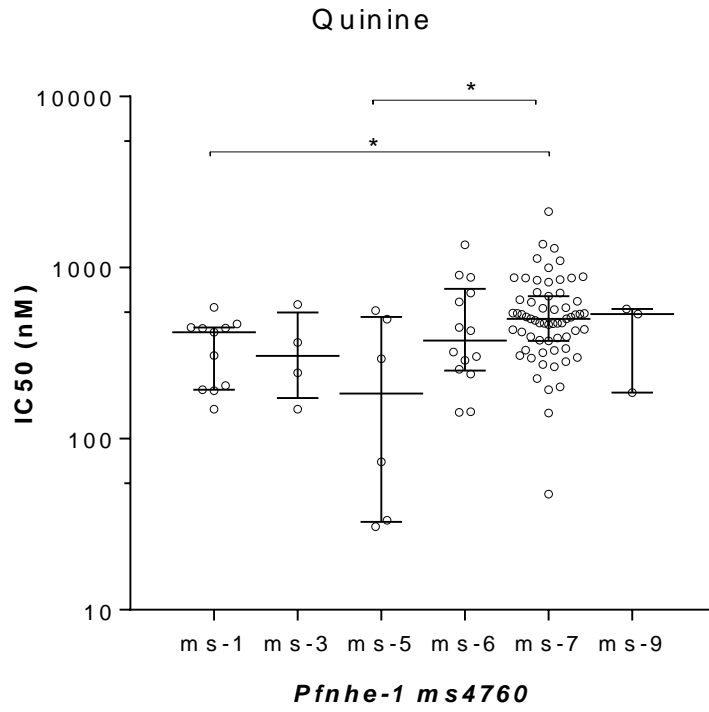

I.

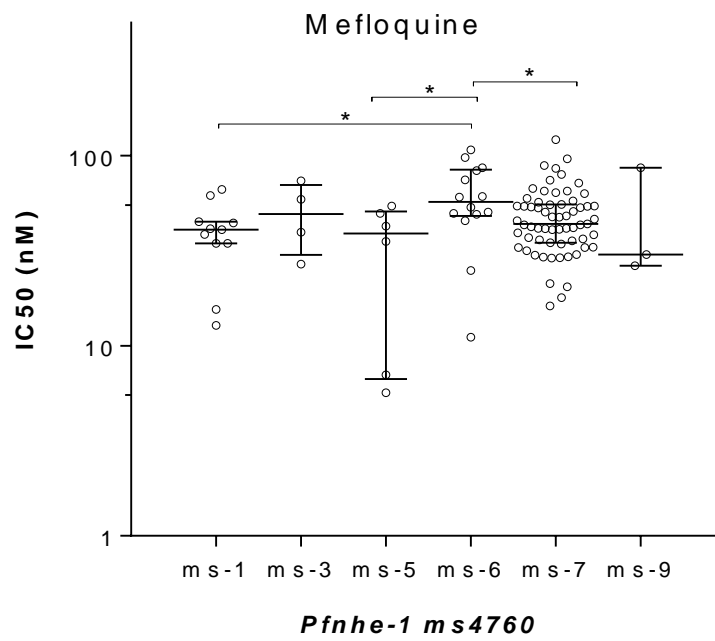

J

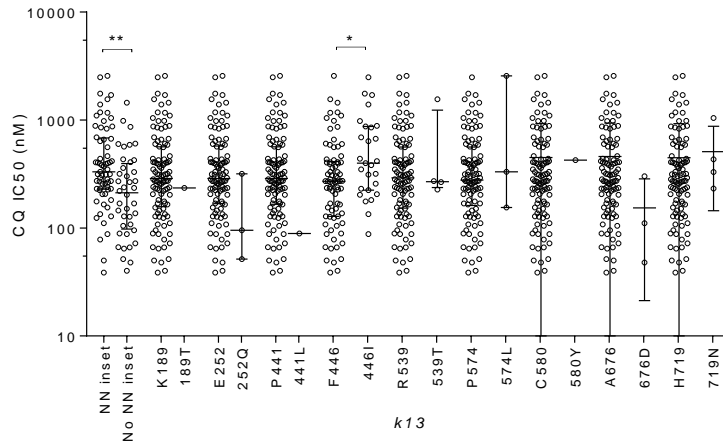

K

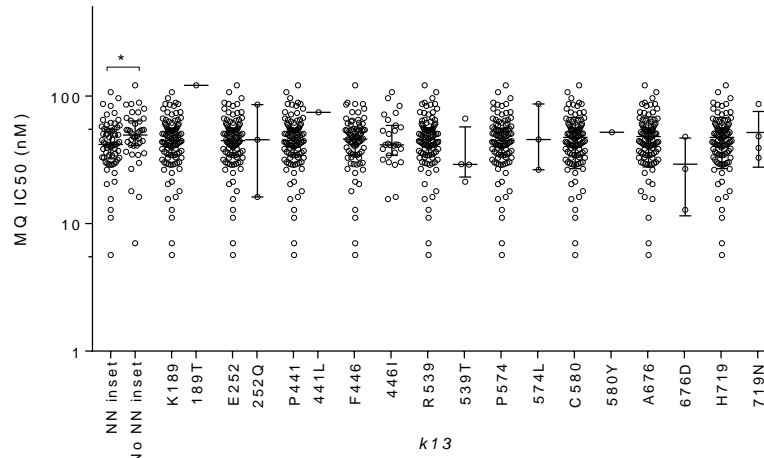

L

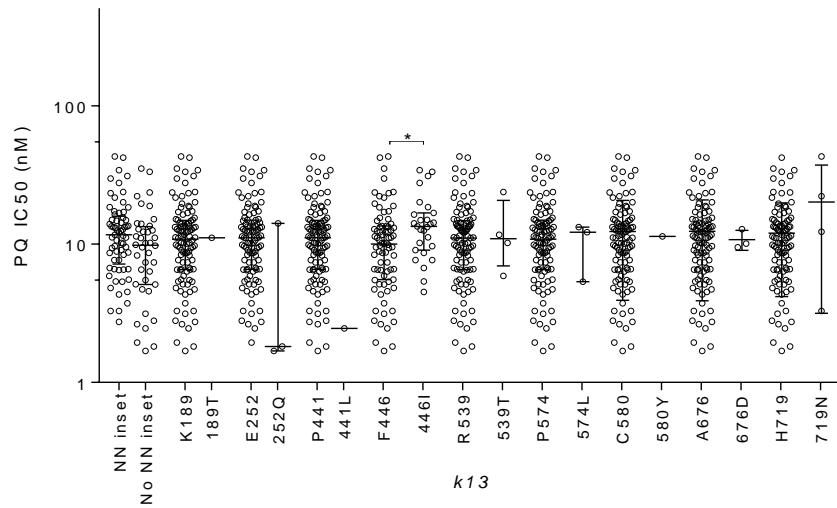

Figure S3

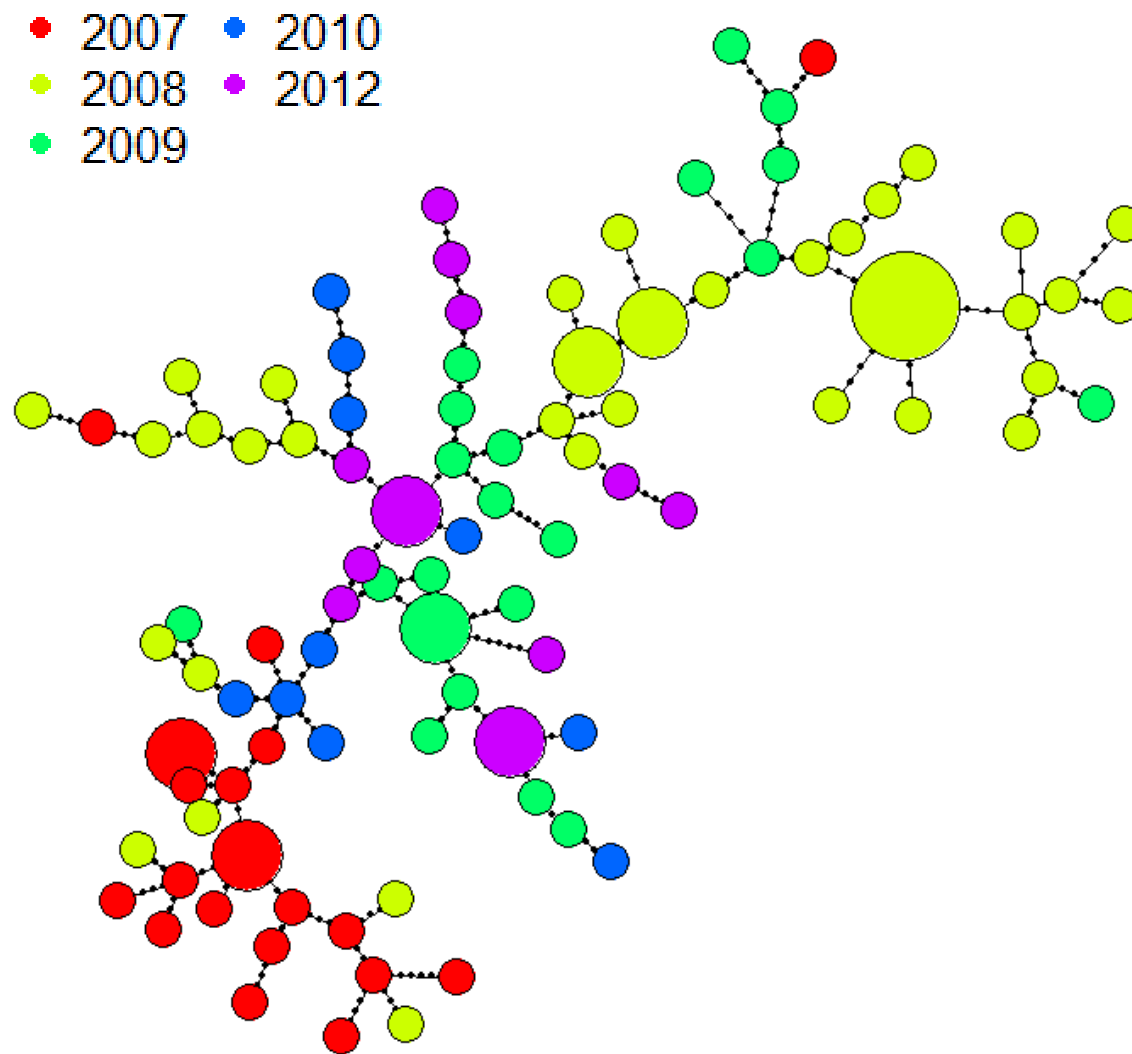

**Table S1. *In vitro* IC<sub>50</sub>s (nM) of culture-adapted field isolates from the China-Myanmar border to 10 antimalarial drugs during 2007-2012**

| Drugs | 2007 (N=21)          |             | 2008 (N=41)          |             | 2009 (N=22)         |           | 2010 (N=10)          |             | 2012 (N=13)          |            |
|-------|----------------------|-------------|----------------------|-------------|---------------------|-----------|----------------------|-------------|----------------------|------------|
|       | Median (IQR)         | Range       | Median (IQR)         | Range       | Median (IQR)        | Range     | Median (IQR)         | Range       | Median (IQR)         | Range      |
| CQ    | 145.0(96.8-310.3)    | 51.6-415.6  | 266.5 (105.3-752.3)  | 38.7-2536   | 296.9(231.2-394.6)  | 165-1045  | 382.4 (269.0-567.1)  | 234.9-659.9 | 692.3 (422.0-1281.0) | 136.5-1559 |
| PQ    | 5.3 (2.8-10.9)       | 1.8-19.6    | 10.2 (7.7-14.04)     | 1.7-34.3    | 11.14 (6.6-16.0)    | 3.3-42.9  | 14.2 (12.1-18.2)     | 6.4-29.8    | 14.3 (11.6-21.1)     | 5.1-35.2   |
| MQ    | 54.0 (42.5-62.4)     | 35.6-86.4   | 41.42 (29.7-54.7)    | 11.1-107.2  | 45.9 (33.9-53.7)    | 24.9-96.2 | 44.1 (26.4-54.2)     | 5.6-121.1   | 43.2 (35.7-62.3)     | 20.4-73.6  |
| NQ    | 12.4 (4.7-17.1)      | 2.8-32      | 11.2 (7.31-13.54)    | 1.6-30.8    | 10.05 (6.7-16.7)    | 1.7-29.6  | 11.5 (5.8-16.6)      | 5.3-24.5    | 8.2 (4.1-13.8)       | 2.2-20.2   |
| QN    | 440.3 (317.3-634.7)  | 204.2-875.6 | 421.6 (246.7-611.2)  | 47.4-1374   | 506.4 (352.0-712.4) | 149-2123  | 435 (120.0-611.2)    | 30.6-1095   | 500.9 (299.9-553.5)  | 141-607.8  |
| PY    | 2690 (1055.0-4312.0) | 8.4-5613    | 3035 (1972.0-5219.0) | 222.7-10519 | 5159 (4200-5997)    | 3144-7038 | 5238 (4316.0-5996.0) | 3569-6622   | 4834 (3676.0-6336.0) | 2283-8102  |
| PND   | 8.2 (5.0-17.6)       | 3.6-28.1    | 14.7 (6.9-18.0)      | 2.6-39.3    | 9.8 (4.2-17.8)      | 2.2-28.1  | 8.5 (8.1-11.9)       | 7.8-16.4    | 10.4 (9.1-14.9)      | 4.3-30.2   |
| LMF   | 5.7 (4.2-6.8)        | 3-11.5      | 4.7 (3.4-6.7)        | 2.3-16.9    | 5.150 (4.3-7.2)     | 3.4-8.7   | 4.7 (3.2-6.1)        | 2.7-9.7     | 5.2 (2.4-6.9)        | 1.7-8.6    |
| AS    | 11.2 (10.5-13.1)     | 6.2-20.2    | 9.8 (7.5-12.7)       | 1.6-27.7    | 10.65 (8.1-14.9)    | 4.8-18.7  | 13.1 (8.8-18.9)      | 5.8-19.2    | 11.4 (8.3-20.3)      | 5.7-29.7   |
| DHA   | 3.8 (2.7-5.3)        | 1.6-11.0    | 3.5 (2.3-5.5)        | 1.1-10.2    | 4.800(3.6-6.8)      | 1.3-8.8   | 5.4 (3.3-6.1)        | 1.7-8.2     | 4.6 (3.4-6.8)        | 1.4-7.5    |

IQR – interquartile range.



**Table S2.** *In vitro* IC<sub>50</sub> values of *P. falciparum* isolates with different susceptibilities to chloroquine to 10 antimalarial drugs

| Drug               | Isolates with moderate CQ resistance (n=15) |                     | Isolates with high CQ resistance (n=92) |                     | P*                |
|--------------------|---------------------------------------------|---------------------|-----------------------------------------|---------------------|-------------------|
|                    | Median IC <sub>50</sub> (nM)                | Interquartile range | Median IC <sub>50</sub> (nM)            | Interquartile range |                   |
| Chloroquine        | 66.6                                        | 50.1-88.0           | 315.9                                   | 226.7-604.1         |                   |
| Piperaquine        | 5.5                                         | 2.5-9.7             | 11.9                                    | 7.4-15.4            | <b>&lt;0.0001</b> |
| Naphthoquine       | 12.4                                        | 11.2-15.4           | 10.6                                    | 6.4-16.8            | 0.1464            |
| Mefloquine         | 48.0                                        | 35.3-74.3           | 44.6                                    | 34.5-56.5           | 0.5628            |
| Lumefantrine       | 4.7                                         | 3.7-5.5             | 5.2                                     | 3.6-6.8             | 0.6741            |
| Quinine            | 629.6                                       | 201.3-821.6         | 445.0                                   | 299.7-572.6         | 0.2786            |
| Pyrimethamine      | 3584.0                                      | 1519-5614           | 4153                                    | 2706-5576           | 0.9885            |
| Pyronaridine       | 9.3                                         | 6.3-16.5            | 10.4                                    | 6.6-17.3            | 0.6876            |
| Artesunate         | 9.7                                         | 7.1-13.1            | 11.0                                    | 8.2-14.3            | 0.2659            |
| Dihydroartemisinin | 2.6                                         | 1.9-3.8             | 4.4                                     | 3.3-6.2             | <b>0.0050</b>     |

\*Mann-Whitney U test
